# Supplementary material
Source: Research Square preprint supplement (doi:10.21203/rs.3.rs-9041324/v1)
Supplement: Supplementary file 1 [file 1cd0a69d79fa81d05d690305.docx]

**SUPPLEMENTARY TABLE 1. ICD-9-CM codes used to identify sepsis cases in the administrative database and their classification into four microbiological groups, with corresponding ICD-10-CM categories.**

| **ICD-9-CM code** | **Disease Description** | **Sepsis Group** | **Corresponding ICD-10-CM code(s)** |
| --- | --- | --- | --- |
| **038.0** | *Streptococcal sepsis* | **GRAM-POSITIVE SEPSIS** | **A40.9** (*Streptococcal sepsis*) |
| **038.10** | *Staphylococcal sepsis, unspecified* | **GRAM-POSITIVE SEPSIS** | **A41.0** (*Sepsis due to Staphylococcus aureus*) or **A41.2** (*Other staphylococci*) |
| **038.11** | *Staphylococcus aureus* sepsis | **GRAM-POSITIVE SEPSIS** | **A41.0** |
| **038.19** | *Other staphylococcal sepsis* | **GRAM-POSITIVE SEPSIS** | **A41.2** |
| **038.2** | *Pneumococcal sepsis* | **GRAM-POSITIVE SEPSIS** | **A40.3** (*Sepsis due to Streptococcus pneumoniae*) |
| **038.3** | *Sepsis due to anaerobes* | **ANAEROBIC SEPSIS** | **A41.4** (*Sepsis due to anaerobes*) |
| **038.40** | *Gram-negative sepsis, unspecified* | **GRAM-NEGATIVE SEPSIS** | **A41.5** (*Sepsis due to other Gram-negative organisms*) |
| **038.41** | *Hemophilus influenzae* sepsis | **GRAM-NEGATIVE SEPSIS** | **A41.3** |
| **038.42** | *Escherichia coli* sepsis (E. COLI) | **GRAM-NEGATIVE SEPSIS** | **A41.51**(*Sepsis due to E. coli*) |
| **038.43** | *Pseudomonas* sepsis | **GRAM-NEGATIVE SEPSIS** | **A41.52** |
| **038.44** | *Serratia* sepsis | **GRAM-NEGATIVE SEPSIS** | **A41.53** |
| **003.1** | *Salmonella* sepsis | **GRAM-NEGATIVE SEPSIS** | **A02.1** (*Salmonella sepsis*) |
| **038.9** | *Unspecified sepsis* | **UNSPECIFIED SEPSIS** | **A41.9** (*Sepsis, unspecified organism*) |
| **995.91** | *Sepsis (Systemic Inflammatory Response)* | **UNSPECIFIED SEPSIS** | **A41.9** |
| **995.92** | *Severe sepsis / Septic shock* | **UNSPECIFIED SEPSIS** | **R65.20** (*Severe sepsis*) / **R65.21** (*Septic shock*) |

Unspecified sepsis includes cases without microorganism-specific ICD-9-CM codes in the discharge record.
